# Supplementary material
Source: Royal Society of Chemistry journal article supplement (doi:10.1039/d6tb01182a)
Supplement: d6tb01182a1.pdf [file d6tb01182a1.pdf]

## Supporting Information

### **Diradical-Featured N-Arene Croconaine-Based Nanoagent for Synergistic Photodynamic/Photothermal Tumor Therapy**

Yiru Tang,<sup>‡a, b</sup> Xiaoyu Zhu,<sup>‡a</sup> Yating Zeng,<sup>a</sup> Wanying Li,<sup>a</sup> Na Hao,<sup>a</sup> Ji Lu,<sup>a</sup> Bowen Lei,<sup>a</sup> Yao Jian,<sup>\*a</sup> and Lin Yang<sup>\*a</sup>

<sup>a</sup> Green Pharmaceutical Technology Key Laboratory of Luzhou City, Central Nervous System Product Research and Development Key Laboratory of Sichuan Province, School of Pharmacy, Southwest Medical University, Luzhou 646000, PR China  
E-mail: jianyao@swmu.edu.cn yanglinyjl@swmu.edu.cn.

<sup>b</sup> Department of Pharmacy, Wusheng People's Hospital, Guangan 638400, PR China

<sup>‡</sup> These authors contributed equally to this work.

**Table S1** Photothermal properties of croconaine-based photothermal agents with different structural types.

| Croconaine dyes | PCE                       | Treatment methods | References                                 |
|-----------------|---------------------------|-------------------|--------------------------------------------|
| C-arene CR      | CR780                     | 54.49%            | PTT                                        |
|                 | TCR                       | 77%               | PDT/PTT                                    |
|                 | CCQ                       | 62.9%             | PTT                                        |
|                 | CR880                     | 58%               | PTT                                        |
|                 | DRM                       | 68%               | PTT                                        |
|                 | CR-DPA-T                  | 72%               | PTT                                        |
| C-arylidene CR  | Croc770                   | 32.0%             | PTT                                        |
|                 | Croc815                   | 34.7%             | PTT                                        |
|                 | CR760                     | 45.37%            | PTT                                        |
|                 | CR-630                    | 46.1%             | PTT                                        |
|                 | CR1045                    | 84%               | PTT                                        |
| N-arene CR      | CR-(DPA) <sub>2</sub> OMe | 85.05%            | water evaporation and antibacterial effect |
|                 | <b>CR620</b>              | <b>41.12%</b>     | <b>PDT/PTT</b>                             |
|                 |                           |                   | <b>this work</b>                           |

**C-arene CR**

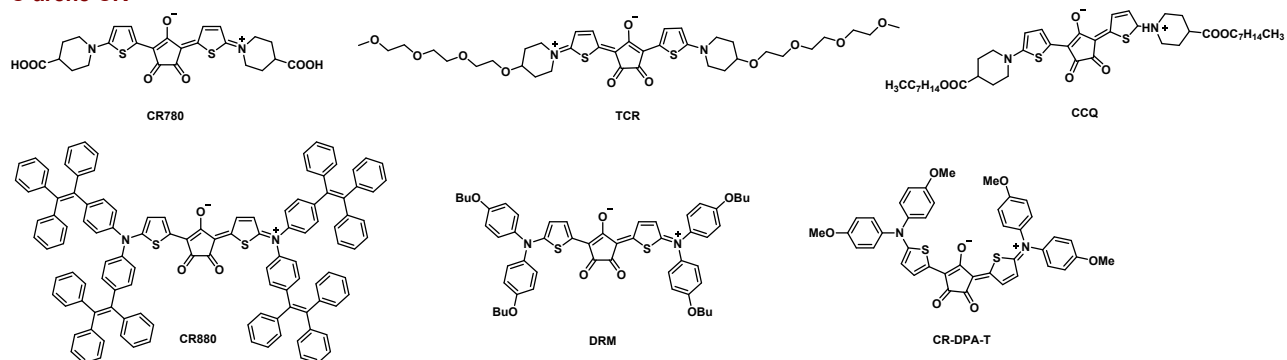

**C-arylidene CR**

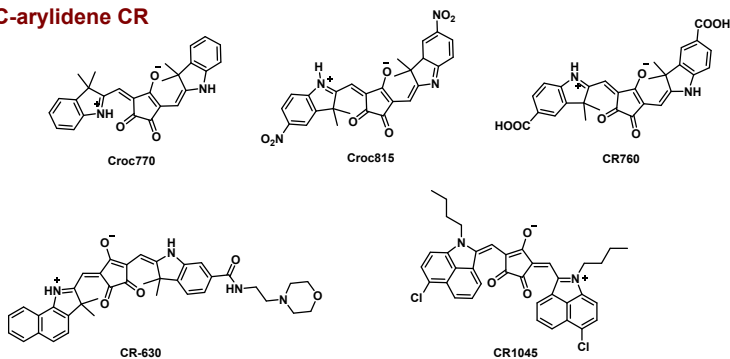

**N-arene CR**

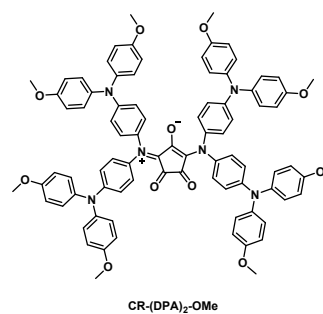

**Figure S1.** Chemical structures of the croconaine dyes mentioned in Table S1.

**Table S2** Comparison of irradiation parameters between this work and representative literature.

| Power density (W/cm <sup>2</sup> ) | Irradiation time (min) | Energy dose (J/cm <sup>2</sup> ) | Reference        |
|------------------------------------|------------------------|----------------------------------|------------------|
| <b>1</b>                           | <b>1</b>               | <b>60</b>                        | <b>this work</b> |
| 0.7                                | 5                      | 210                              | 12               |
| 0.8                                | 6                      | 288                              | 13               |
| 0.7                                | 10                     | 420                              | 10               |
| 1.5                                | 5                      | 450                              | 14               |
| 1                                  | 10                     | 600                              | 5, 15-17         |

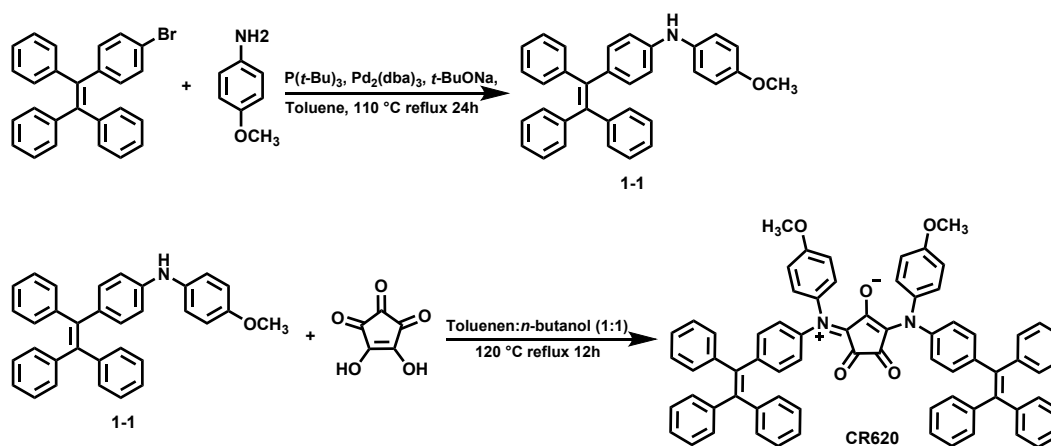

**Figure S2.** Synthetic routes of 1-1 and CR620.

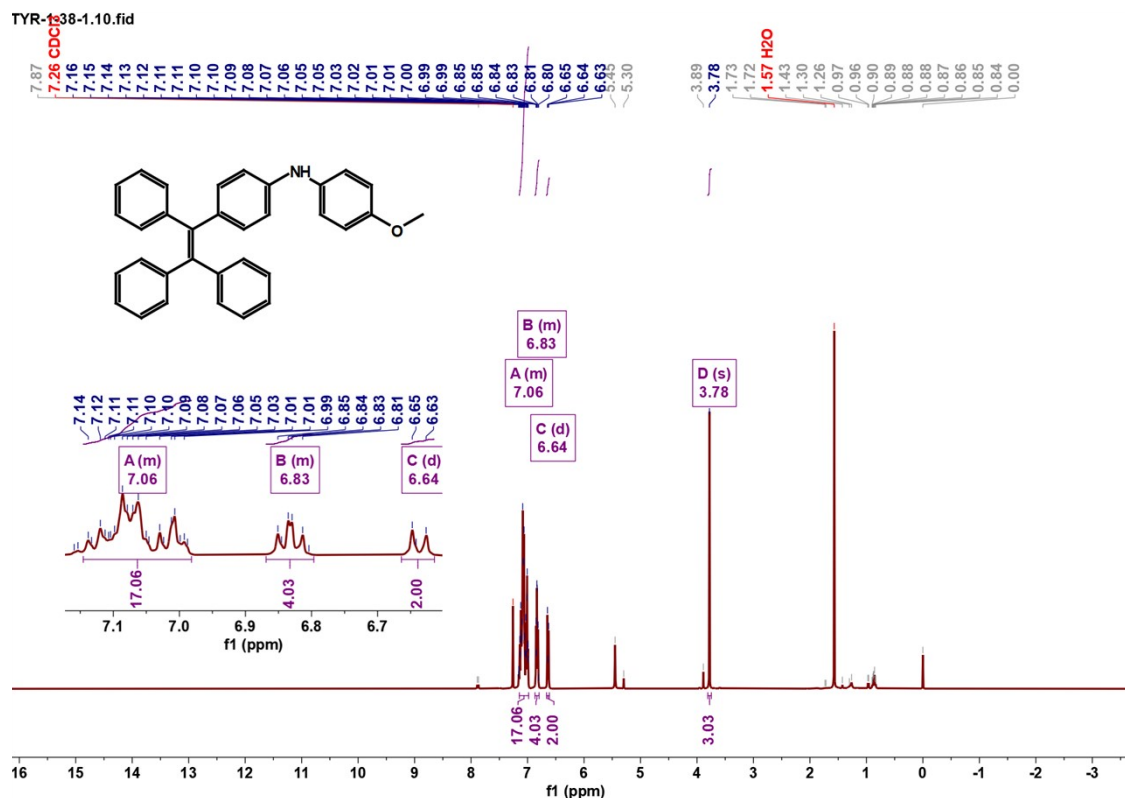

Figure S3.  $^1\text{H}$  NMR spectrum of 1-1.

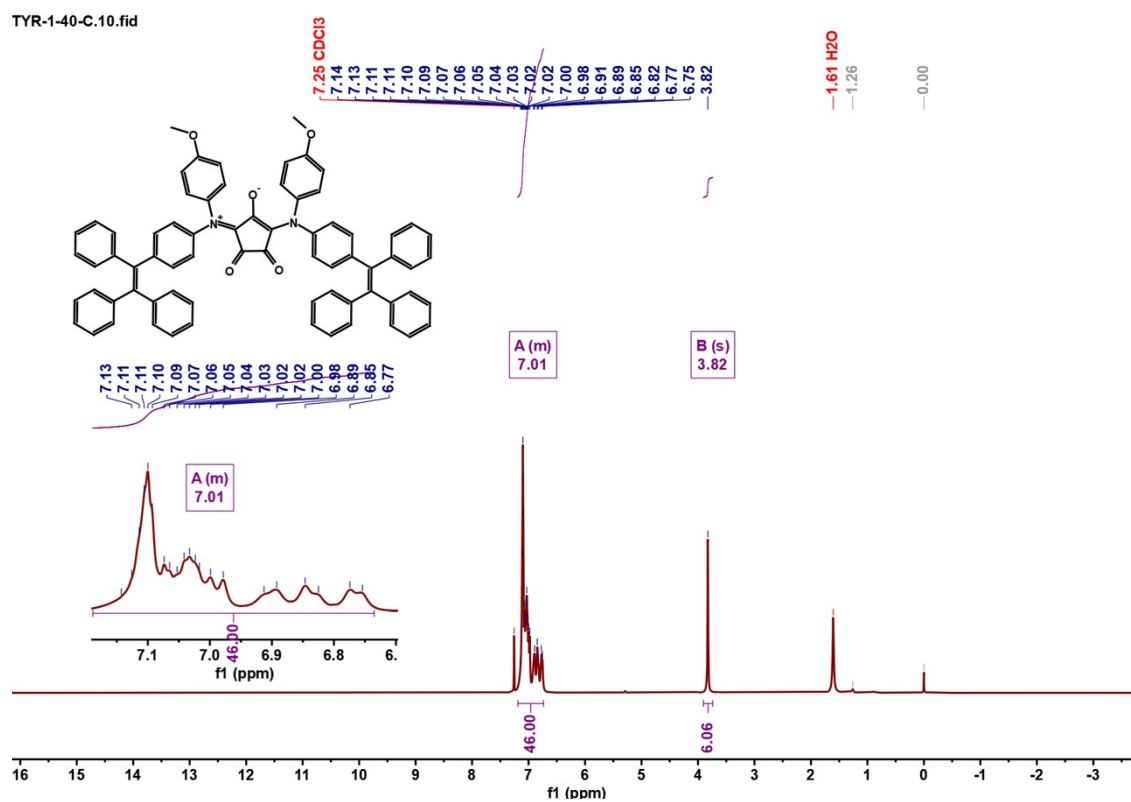

Figure S4.  $^1\text{H}$  NMR spectrum of CR620.

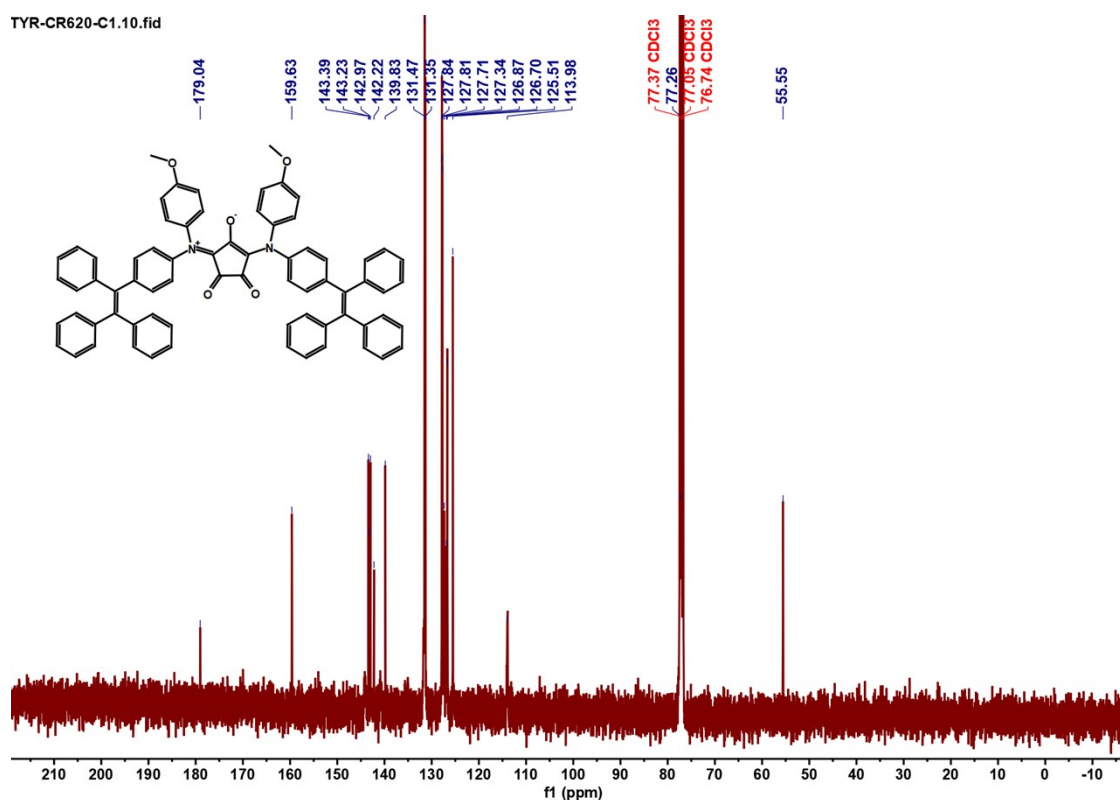

Figure S5.  $^{13}\text{C}$  NMR spectrum of CR620.

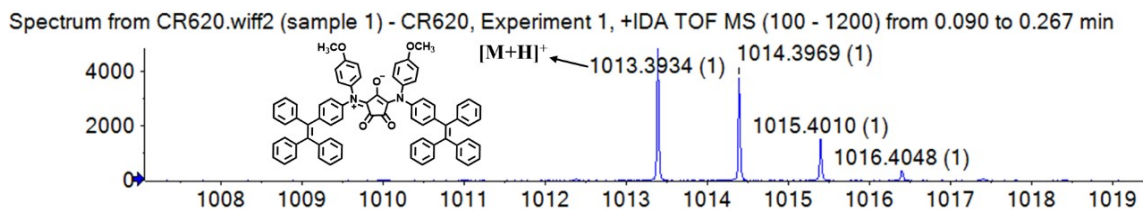

Figure S6. MS of CR620.

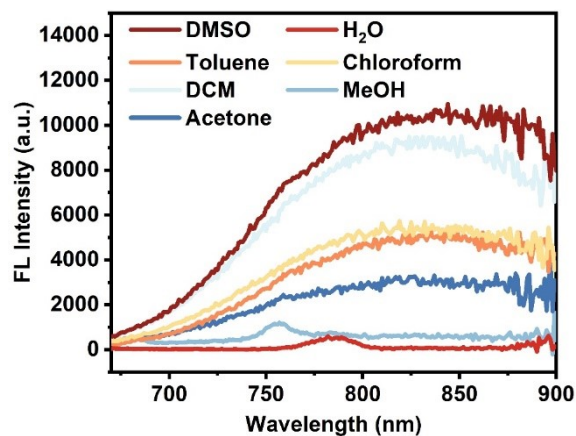

Figure S7. Fluorescence emission spectra of CR620 in different solvents.

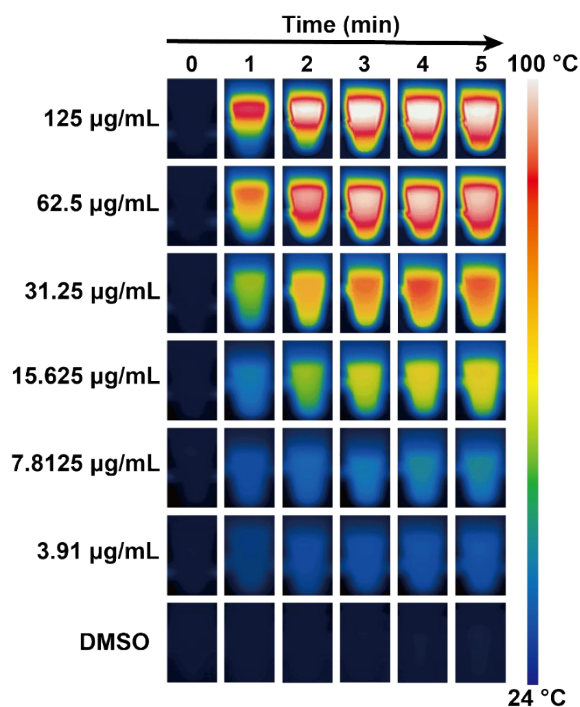

Figure S8. Thermal infrared images of CR620 dimethyl sulfoxide solution at different concentrations upon irradiation of a 660 nm CW laser ( $1.0 \text{ W/cm}^2$ ).

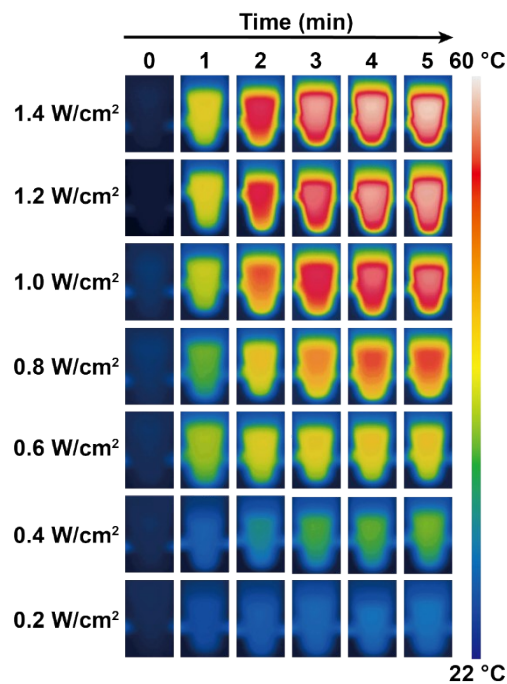

**Figure S9.** Thermal infrared images of CR620 dimethyl sulfoxide solution (7.8125  $\mu\text{g/mL}$ ) upon irradiation of a 660 nm CW laser with different power densities.

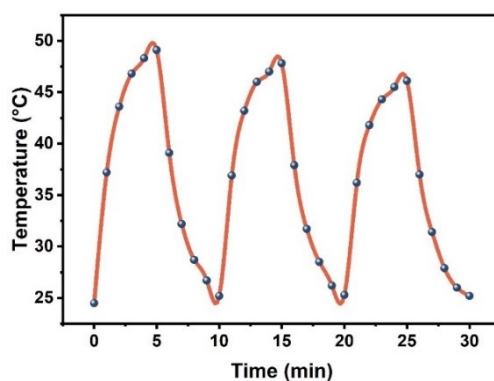

**Figure S10.** Photothermal stability test of CR620 dimethyl sulfoxide solution (7.8125  $\mu\text{g/mL}$ ) during three irradiation cycles.

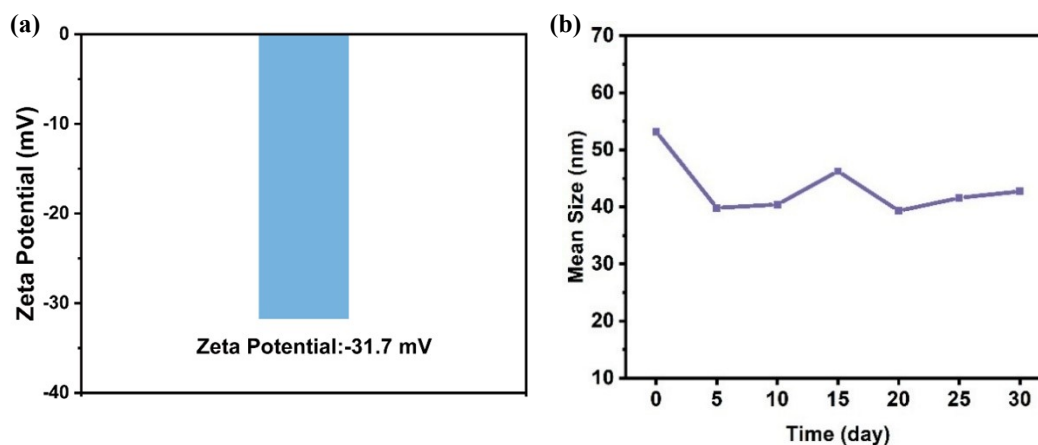

**Figure S11.** (a) Zeta potential of CR620 NPs; (b) Size stability of CR620 NPs in water during 30 days.

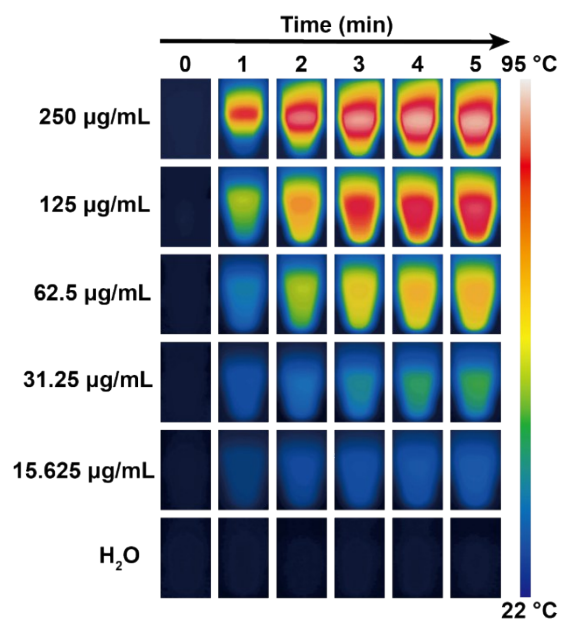

**Figure S12.** Thermal infrared images of CR620 NPs with different concentrations upon irradiation of a 660 nm CW laser ( $1.0 \text{ W/cm}^2$ ).

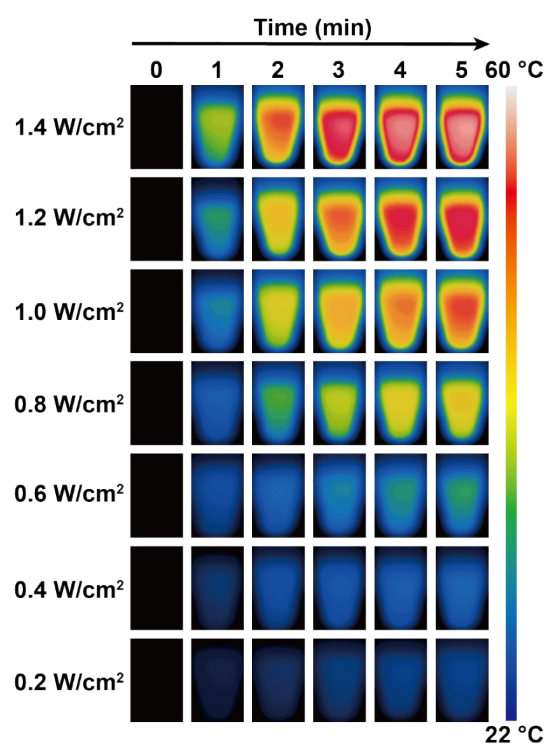

**Figure S13.** Thermal infrared images of CR620 NPs (31.25  $\mu\text{g/mL}$ ) irradiated by a 660 nm CW laser with different power densities.

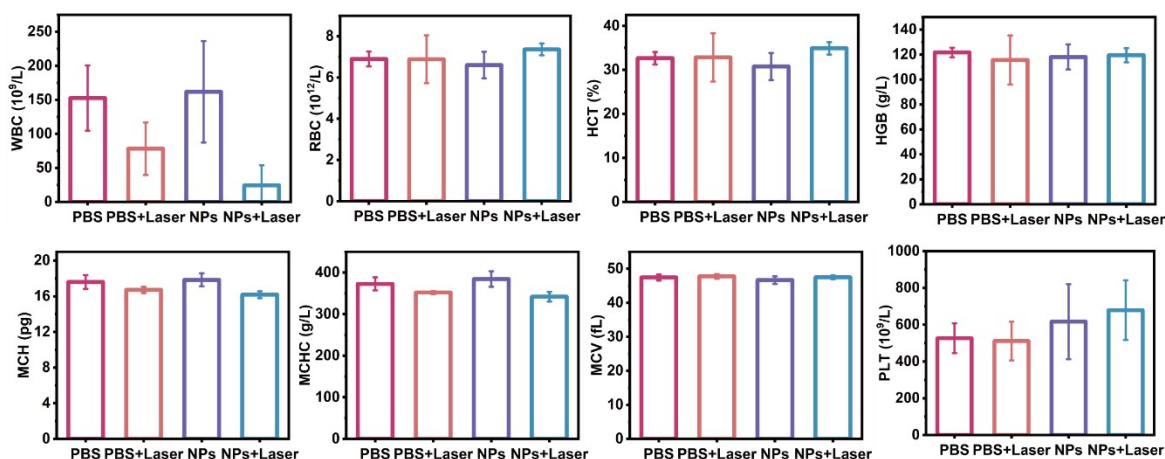

**Figure S14.** Blood routine examination for the mice (the normal reference ranges for these parameters: WBC,  $0.8-10.6 \times 10^9/L$ ; RBC,  $6.5-11.5 \times 10^{12}/L$ ; HCT, 35-55%; HGB, 110-165 g/L; MCH, 13-18 pg; MCHC, 300-360 g/L; MCV, 41-55 fL; PLT,  $400-1600 \times 10^9/L$ ).

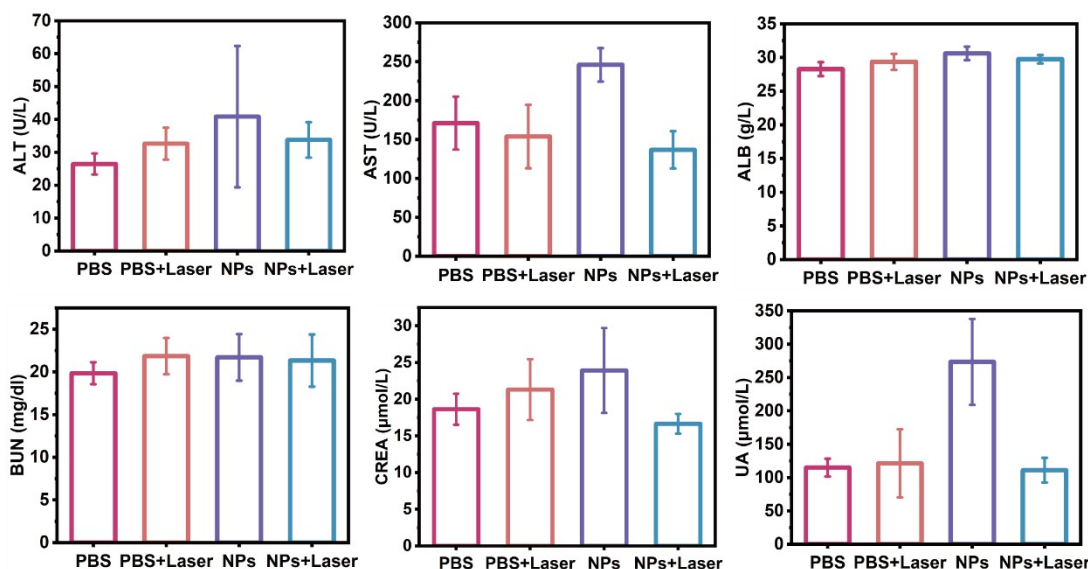

**Figure S15.** Blood biochemistry analysis for the mice (the normal reference ranges for these parameters: ALT, 10.06-96.47 U/L; AST, 36.31-235.48 U/L; ALB, 21.22-39.15 g/L; BUN, 10.81-34.74 mg/dl; CREA, 10.91-85.09  $\mu\text{mol/L}$ ; UA, 44.42-224.77  $\mu\text{mol/L}$ ).

## 2. Photothermal Conversion Efficiency Calculation<sup>5</sup>

To calculate the PCE of CR620 and CR620 NPs, the following protocol was implemented. First, CR620 and CR620 NPs were dissolved in dimethyl sulfoxide (DMSO) or water to prepare solutions of varying concentrations, ensuring complete dissolution. Subsequently, 200  $\mu\text{L}$  of each sample was transferred to an EP tube. The sample was irradiated with a 660 nm laser for 5 min, during which temperature was recorded at 60 s intervals using a thermal infrared camera. After laser cessation, the sample was allowed to cool naturally to room temperature, with temperature monitored until stabilization. Using CR620 DMSO solution as an example, the PCE was calculated via the following equation 1:

$$\eta = \frac{hs(T_{max} - T_{surr}) - Q_{dis}}{I(1 - 10^{-A_{660}})}$$

where  $h$  represents the heat transfer coefficient,  $s$  is the surface area of the EP tube,  $T_{max}$  is the maximum temperature achieved by laser irradiation of the sample,  $T_{surr}$  is the ambient temperature of the environment set at 22 °C,  $Q_{dis}$  is the heat dissipation from solvent and EP tube absorption,  $I$  is the incident laser power (1.0 W/cm<sup>2</sup>), and  $A_{660}$  is the absorbance of CR620 DMSO solution (7.8125 µg/mL) at 660 nm.

The value  $hs$  was calculated using the following equation 2:

$$hs = \frac{m_D c_D}{\tau_s}$$

where  $\tau_s$  is the time constant of the sample system,  $m_D$  and  $c_D$  are the mass (0.22 g) and heat capacity (1.95 kJ/(kg·°C)) of DMSO respectively.<sup>18</sup>

The value  $\tau_s$  can be derived from the following equation 3:

$$\tau_s = \frac{t}{-\ln\theta}$$

where  $t$  is the time elapsed after laser irradiation ceases and  $\theta$  is normalized temperature decay parameter and calculated using the following equation 4:

$$\theta = \left( \frac{T_{RT} - T_{surr}}{T_{max} - T_{surr}} \right)$$

where  $T_{RT}$  is the sample temperature at time  $t$ .

$Q_{dis}$  was calculated using the following equation 5:

$$Q_{dis} = \frac{m_D c_D (T_{max}(DMSO) - T_{surr})}{\tau_s(DMSO)}$$

## References

1. L. Tang, F. Zhang, F. Yu, W. Sun, M. Song, X. Chen, X. Zhang and X. Sun, *Biomaterials*, 2017, **129**, 28-36.
2. E. Pang, R. Huang, S. Zhao, K. Yang, B. Li, Q. Tan, S. Tan, M. Lan, B. Wang and X. Song, *J. Mater. Chem. B*, 2022, **10**, 9848-9854.
3. W. Wang, J. Yu, Y. Lin, M. Li, Y. Pan, Y. He, L. Liu, X. Meng, Z. Lv, K. Jin, S. Che, X. Mou and Y. Cai, *Biomater. Adv.*, 2023, **149**, 213418.
4. N. Liu, P. O'Connor, V. Gujrati, P. Anzenhofer, U. Klemm, K. Kleigrewe, M. Sattler, O. Plettenburg and V. Ntziachristos, *Nanophotonics*, 2022, **11**, 4637-4647.
5. X. Li, D. Zhang, C. Yin, G. Lu, Y. Wan, Z. Huang, J. Tan, S. Li, J. Luo and C. S. Lee, *ACS Appl. Mater. Interfaces*, 2021, **13**, 15983-15991.
6. Y. Dong, P. Xia, X. Xu, J. Shen, Y. Ding, Y. Jiang, H. Wang, X. Xie, X. Zhang, W. Li, Z. Li, J. Wang and S. C. Zhao, *J. Nanobiotechnol.*, 2023, **21**, 442.
7. S. Li, K.-H. Lui, X. Li, X. Fang, W.-S. Lo, Y.-J. Gu and W.-T. Wong, *ACS Appl. Bio Mater.*, 2021, **4**, 4152-4164.

8. N. Liu, P. O'Connor, V. Gujrati, D. Gorpas, S. Glasl, A. Blutke, A. Walch, K. Kleigrewe, M. Sattler, O. Plettenburg and V. Ntziachristos, *Adv. Healthc. Mater.*, 2021, **10**, 2002115.
9. P. D. You, C. R. Ouyang, F. Lu, C. Zeng, H.-D. Cai, G.-S. Shi, L. Liu and C.-Q. Zhou, *J. Photochem. Photobiol. B: Biol.*, 2023, **245**, 112748.
10. J. Li, X. Su and N. Liu, *Sensors Actuators B: Chem.*, 2024, **408**, 1355535.
11. L. Yang, G. Wang, Y. Zhang, J. Zhou, R. Wu, C. Qin, Q. Chang, C. Zhang, S. Duan and X. Gu, *Angew. Chem. Int. Ed.*, 2025, **64**, e202508821.
12. X. Chen, X. Ma, G. Yang, G. Huang, H. Dai, J. Yu and N. Liu, *ACS Appl. Mater. Interfaces*, 2024, **16**, 12332-12338.
13. Y. Dong, H. Wang, X. Zhang, Y. Ding, Y. Zou, J. Wang, S.-C. Zhao and Z. Li, *J. Nanobiotechnol.*, 2024, **22**, 481.
14. Y. Chen, L. Liu, L. Yu, Y. Kang, S. Yao, D. Wu, J. Xu, X. Mou and Y. Cai, *Chem. Eng. J.*, 2024, **488**, 150907.
15. P. You, F. Lu, C. Ouyang, J. Yu, J. González-García, J. Song, W. Ni, J. Wang, C. Yin and C.-Q. Zhou, *ACS Appl. Mater. Interfaces*, 2024, **16**, 46066-46078.
16. C. Ouyang, J. Yu, H. Teng, G. Ou, B. Lu, X. Zhang, H. Xie and C.-Q. Zhou, *J. Colloid Interface Sci.*, 2026, **702**, 139005.
17. X. Kong, J. Liang, M. Lu, K. Zhang, E. Zhao, X. Kang, G. Wang, Q. Yu, Z. Gan and X. Gu, *Adv. Mater.*, 2024, **36**, 2409041.
18. Ferdinandus, W. L. L. Tan, J. R. Tan, H. K. Lee, Q. Zhu, E. Ye and C.-L. K. Lee, *Chem. Asian J.*, 2024, **19**, e202400328.
